# Supplementary material for: A Catalog of GNI-A1 Genes That Regulate Floret Fertility in a Diverse Bread Wheat Collection
Source: MDPI journal article supplement (doi:10.3390/plants13030330), 2024-01-23
Supplement: s1 [file s1]

**Supplementary Table S1.** Members of the NBRP bread wheat panel.

| NBRP no. | Line                      | Species            | Country     | GNI-A1 allele <sup>1</sup> |
|----------|---------------------------|--------------------|-------------|----------------------------|
| 6x-001   | KU-166                    | <i>T. aestivum</i> | China       | Y                          |
| 6x-002   | KU-265 (Norin 10)         | <i>T. aestivum</i> | Japan       | Y                          |
| 6x-003   | KU-309 (Baart)            | <i>T. aestivum</i> | USA         | -                          |
| 6x-004   | KU-333 (Selkerk)          | <i>T. aestivum</i> | Canada      | Y                          |
| 6x-005   | KU-336 (Wichita)          | <i>T. aestivum</i> | USA         | N                          |
| 6x-006   | KU-366 (April Bearded)    | <i>T. aestivum</i> | UK          | N                          |
| 6x-007   | KU-370 (Renown)           | <i>T. aestivum</i> | UK          | N                          |
| 6x-008   | KU-371 (Wilhelmina)       | <i>T. aestivum</i> | UK          | N                          |
| 6x-009   | KU-372 (Little Joss)      | <i>T. aestivum</i> | UK          | N                          |
| 6x-010   | KU-373 (Victor)           | <i>T. aestivum</i> | UK          | N                          |
| 6x-011   | KU-374 (Yeoman)           | <i>T. aestivum</i> | UK          | N                          |
| 6x-012   | KU-405                    | <i>T. aestivum</i> | Uzbekistan  | Y                          |
| 6x-013   | KU-479                    | <i>T. aestivum</i> | China       | Y                          |
| 6x-014   | KU-481                    | <i>T. aestivum</i> | China       | Y                          |
| 6x-015   | KU-483                    | <i>T. aestivum</i> | Tanzania    | Y                          |
| 6x-016   | KU-497                    | <i>T. aestivum</i> | India       | Y                          |
| 6x-017   | KU-504                    | <i>T. aestivum</i> | China       | Y                          |
| 6x-018   | KU-601 (Gifu Wase Komugi) | <i>T. aestivum</i> | Japan       | Y                          |
| 6x-019   | KU-1002                   | <i>T. aestivum</i> | Spain       | Y                          |
| 6x-020   | KU-1005                   | <i>T. aestivum</i> | Spain       | Y                          |
| 6x-021   | KU-1011                   | <i>T. aestivum</i> | Spain       | N                          |
| 6x-022   | KU-1049                   | <i>T. aestivum</i> | Spain       | K                          |
| 6x-023   | KU-1143                   | <i>T. aestivum</i> | Spain       | N                          |
| 6x-024   | KU-1215 (Akita Zairai)    | <i>T. aestivum</i> | Japan       | K                          |
| 6x-025   | KU-1230 (Fukoku)          | <i>T. aestivum</i> | Japan       | Y                          |
| 6x-026   | KU-1279 (Murasaki Aka)    | <i>T. aestivum</i> | Japan       | N                          |
| 6x-027   | KU-1302                   | <i>T. aestivum</i> | Greece      | N                          |
| 6x-028   | KU-1347                   | <i>T. aestivum</i> | Greece      | -                          |
| 6x-029   | KU-1392                   | <i>T. aestivum</i> | Romania     | Y                          |
| 6x-030   | KU-1394                   | <i>T. aestivum</i> | Romania     | N                          |
| 6x-031   | KU-1421                   | <i>T. aestivum</i> | Romania     | N                          |
| 6x-032   | KU-1424                   | <i>T. aestivum</i> | Romania     | Y                          |
| 6x-033   | KU-1521                   | <i>T. aestivum</i> | Azerbaijan  | N                          |
| 6x-034   | KU-1527                   | <i>T. aestivum</i> | Armenia     | N                          |
| 6x-035   | KU-1644                   | <i>T. aestivum</i> | Armenia     | Y                          |
| 6x-036   | KU-1668                   | <i>T. aestivum</i> | Georgia     | N                          |
| 6x-037   | KU-1697                   | <i>T. aestivum</i> | Georgia     | N                          |
| 6x-038   | KU-1797                   | <i>T. aestivum</i> | Georgia     | N                          |
| 6x-039   | KU-3006                   | <i>T. aestivum</i> | Pakistan    | Y                          |
| 6x-040   | KU-3010                   | <i>T. aestivum</i> | Pakistan    | Y                          |
| 6x-041   | KU-3037                   | <i>T. aestivum</i> | Pakistan    | Y                          |
| 6x-042   | KU-3045                   | <i>T. aestivum</i> | Afghanistan | Y                          |
| 6x-043   | KU-3054                   | <i>T. aestivum</i> | Afghanistan | Y                          |
| 6x-044   | KU-3062                   | <i>T. aestivum</i> | Afghanistan | Y                          |
| 6x-045   | KU-3083                   | <i>T. aestivum</i> | Afghanistan | N                          |
| 6x-046   | KU-3089                   | <i>T. aestivum</i> | Afghanistan | Y                          |
| 6x-047   | KU-3097                   | <i>T. aestivum</i> | Iran        | Y                          |
| 6x-048   | KU-3098                   | <i>T. aestivum</i> | Iran        | Y                          |
| 6x-049   | KU-3121                   | <i>T. aestivum</i> | Iran        | Y                          |
| 6x-050   | KU-3126                   | <i>T. aestivum</i> | Iran        | Y                          |

|        |          |                    |             |   |
|--------|----------|--------------------|-------------|---|
| 6x-051 | KU-3136  | <i>T. aestivum</i> | Iran        | Y |
| 6x-052 | KU-3162  | <i>T. aestivum</i> | Iran        | Y |
| 6x-053 | KU-3184  | <i>T. aestivum</i> | Iran        | Y |
| 6x-054 | KU-3189  | <i>T. aestivum</i> | Iran        | Y |
| 6x-055 | KU-3202  | <i>T. aestivum</i> | Iran        | Y |
| 6x-056 | KU-3232  | <i>T. aestivum</i> | Iran        | Y |
| 6x-057 | KU-3236  | <i>T. aestivum</i> | Iran        | Y |
| 6x-058 | KU-3274  | <i>T. aestivum</i> | Iran        | Y |
| 6x-059 | KU-3289  | <i>T. aestivum</i> | Iran        | Y |
| 6x-060 | KU-3299  | <i>T. aestivum</i> | Pakistan    | Y |
| 6x-061 | KU-3351  | <i>T. aestivum</i> | Pakistan    | Y |
| 6x-062 | KU-3752  | <i>T. aestivum</i> | Egypt       | N |
| 6x-063 | KU-3777  | <i>T. aestivum</i> | Jordan      | N |
| 6x-064 | KU-3778  | <i>T. aestivum</i> | Lebanon     | N |
| 6x-065 | KU-3780  | <i>T. aestivum</i> | Syria       | N |
| 6x-066 | KU-3784  | <i>T. aestivum</i> | Turkey      | N |
| 6x-067 | KU-3789  | <i>T. aestivum</i> | Turkey      | Y |
| 6x-068 | KU-3801  | <i>T. aestivum</i> | Turkey      | N |
| 6x-069 | KU-3806  | <i>T. aestivum</i> | Turkey      | N |
| 6x-070 | KU-3818  | <i>T. aestivum</i> | Turkey      | Y |
| 6x-071 | KU-3834  | <i>T. aestivum</i> | Turkey      | Y |
| 6x-072 | KU-3851  | <i>T. aestivum</i> | Turkey      | Y |
| 6x-073 | KU-3857  | <i>T. aestivum</i> | Turkey      | K |
| 6x-074 | KU-3860  | <i>T. aestivum</i> | Turkey      | N |
| 6x-075 | KU-3868  | <i>T. aestivum</i> | Italy       | N |
| 6x-076 | KU-4703  | <i>T. aestivum</i> | Nepal       | Y |
| 6x-077 | KU-4714  | <i>T. aestivum</i> | Nepal       | Y |
| 6x-078 | KU-4734  | <i>T. aestivum</i> | Nepal       | Y |
| 6x-079 | KU-4759  | <i>T. aestivum</i> | Nepal       | Y |
| 6x-080 | KU-4769  | <i>T. aestivum</i> | Nepal       | Y |
| 6x-081 | KU-4783  | <i>T. aestivum</i> | Nepal       | N |
| 6x-082 | KU-7001  | <i>T. aestivum</i> | Bhutan      | Y |
| 6x-083 | KU-7041  | <i>T. aestivum</i> | Bhutan      | Y |
| 6x-084 | KU-7113  | <i>T. aestivum</i> | Bhutan      | Y |
| 6x-085 | KU-7180  | <i>T. aestivum</i> | Bhutan      | Y |
| 6x-086 | KU-7356  | <i>T. aestivum</i> | Ethiopia    | Y |
| 6x-087 | KU-7379  | <i>T. aestivum</i> | Ethiopia    | Y |
| 6x-088 | KU-7406  | <i>T. aestivum</i> | Ethiopia    | Y |
| 6x-089 | KU-7437  | <i>T. aestivum</i> | Afghanistan | Y |
| 6x-090 | KU-7459  | <i>T. aestivum</i> | Afghanistan | Y |
| 6x-091 | KU-7480  | <i>T. aestivum</i> | Afghanistan | Y |
| 6x-092 | KU-7624  | <i>T. aestivum</i> | Afghanistan | Y |
| 6x-093 | KU-7653  | <i>T. aestivum</i> | Afghanistan | Y |
| 6x-094 | KU-7669  | <i>T. aestivum</i> | Afghanistan | Y |
| 6x-095 | KU-9431  | <i>T. aestivum</i> | Ethiopia    | Y |
| 6x-096 | KU-9460  | <i>T. aestivum</i> | Ethiopia    | - |
| 6x-097 | KU-9797  | <i>T. aestivum</i> | Ethiopia    | Y |
| 6x-098 | KU-9820  | <i>T. aestivum</i> | Ethiopia    | Y |
| 6x-099 | KU-9867  | <i>T. aestivum</i> | Ethiopia    | Y |
| 6x-100 | KU-10001 | <i>T. aestivum</i> | Iraq        | K |
| 6x-101 | KU-10154 | <i>T. aestivum</i> | Iraq        | Y |
| 6x-103 | KU-10393 | <i>T. aestivum</i> | Iran        | K |
| 6x-105 | KU-10439 | <i>T. aestivum</i> | Iran        | Y |
| 6x-106 | KU-10480 | <i>T. aestivum</i> | Iran        | N |
| 6x-107 | KU-10510 | <i>T. aestivum</i> | Iran        | N |

|        |                               |                         |             |   |
|--------|-------------------------------|-------------------------|-------------|---|
| 6x-108 | KU-11201                      | <i>T. aestivum</i>      | Afghanistan | Y |
| 6x-109 | KU-11214                      | <i>T. aestivum</i>      | Afghanistan | Y |
| 6x-110 | KU-11240A                     | <i>T. aestivum</i>      | Afghanistan | - |
| 6x-111 | KU-11351                      | <i>T. aestivum</i>      | Romania     | Y |
| 6x-112 | KU-11702                      | <i>T. aestivum</i>      | Greece      | Y |
| 6x-113 | KU-11809                      | <i>T. aestivum</i>      | Greece      | K |
| 6x-114 | KU-11829                      | <i>T. aestivum</i>      | Greece      | K |
| 6x-115 | KU-13501                      | <i>T. aestivum</i>      | China       | N |
| 6x-116 | KU-13506                      | <i>T. aestivum</i>      | China       | N |
| 6x-117 | KU-13546                      | <i>T. aestivum</i>      | China       | Y |
| 6x-118 | KU-13631                      | <i>T. aestivum</i>      | China       | Y |
| 6x-119 | KU-13662                      | <i>T. aestivum</i>      | China       | Y |
| 6x-120 | KU-13708                      | <i>T. aestivum</i>      | China       | Y |
| 6x-121 | KU-13807                      | <i>T. aestivum</i>      | China       | Y |
| 6x-122 | KU-13891                      | <i>T. aestivum</i>      | China       | Y |
| 6x-123 | KU-1020                       | <i>T. spelta</i>        | Spain       | N |
| 6x-124 | KU-1062                       | <i>T. spelta</i>        | Spain       | N |
| 6x-125 | KU-1137                       | <i>T. spelta</i>        | Spain       | N |
| 6x-126 | KU-3377                       | <i>T. spelta</i>        | Iran        | Y |
| 6x-127 | KU-3401                       | <i>T. spelta</i>        | Germany     | N |
| 6x-128 | KU-3413                       | <i>T. spelta</i>        | Germany     | N |
| 6x-129 | KU-3416                       | <i>T. spelta</i>        | Germany     | N |
| 6x-130 | KU-3417                       | <i>T. spelta</i>        | Germany     | N |
| 6x-131 | KU-3421                       | <i>T. spelta</i>        | Germany     | N |
| 6x-132 | KU-3443                       | <i>T. spelta</i>        | Germany     | N |
| 6x-133 | KU-3444                       | <i>T. spelta</i>        | Germany     | N |
| 6x-134 | KU-3445                       | <i>T. spelta</i>        | Germany     | N |
| 6x-135 | KU-152                        | <i>T. compactum</i>     | China       | K |
| 6x-136 | KU-1208                       | <i>T. compactum</i>     | Japan       | Y |
| 6x-138 | KU-3063                       | <i>T. compactum</i>     | Afghanistan | - |
| 6x-139 | KU-3242                       | <i>T. compactum</i>     | Iran        | Y |
| 6x-140 | KU-7350                       | <i>T. compactum</i>     | Turkey      | Y |
| 6x-141 | KU-9873                       | <i>T. compactum</i>     | Ethiopia    | - |
| 6x-142 | KU-197                        | <i>T. macha</i>         | Turkey      | N |
| 6x-143 | KU-1812                       | <i>T. macha</i>         | Georgia     | N |
| 6x-144 | KU-1814                       | <i>T. macha</i>         | Georgia     | N |
| 6x-145 | KU-1817                       | <i>T. macha</i>         | Georgia     | N |
| 6x-146 | KU-161                        | <i>T. sphaerococcum</i> | –           | Y |
| 6x-147 | KU-162-2                      | <i>T. sphaerococcum</i> | Pakistan    | Y |
| 6x-148 | KU-3004                       | <i>T. sphaerococcum</i> | Pakistan    | - |
| 6x-149 | KU-192                        | <i>T. vavilovii</i>     | –           | Y |
| 6x-150 | KU-3848                       | <i>T. vavilovii</i>     | Turkey      | Y |
| 6x-151 | Opata 85                      | <i>T. aestivum</i>      | Mexico      | Y |
| 6x-152 | W7984                         | Synthetic               | –           | Y |
| 6x-153 | Chinese Spring                | <i>T. aestivum</i>      | China       | Y |
| 6x-154 | KT019-001 (var. duhamerianum) | <i>T. spelta</i>        | Germany     | N |
| 6x-155 | Timstein                      | <i>T. aestivum</i>      | Australia   | Y |
| 6x-156 | Hope                          | <i>T. aestivum</i>      | USA         | Y |
| 6x-157 | Cheyenne                      | <i>T. aestivum</i>      | USA         | N |
| 6x-158 | Hokkai 240                    | <i>T. aestivum</i>      | Japan       | K |
| 6x-159 | Kanto 107                     | <i>T. aestivum</i>      | Japan       | Y |
| 6x-160 | Norin 26                      | <i>T. aestivum</i>      | Japan       | Y |
| 6x-161 | Norin 61                      | <i>T. aestivum</i>      | Japan       | Y |
| 6x-163 | Chihokukomugi                 | <i>T. aestivum</i>      | Japan       | K |
| 6x-164 | Nanbukomugi                   | <i>T. aestivum</i>      | Japan       | K |

|        |                         |                    |           |   |
|--------|-------------------------|--------------------|-----------|---|
| 6x-165 | Zenkojikomugi           | <i>T. aestivum</i> | Japan     | Y |
| 6x-166 | Sumai 3                 | <i>T. aestivum</i> | China     | N |
| 6x-167 | Nobeokabouzu            | <i>T. aestivum</i> | Japan     | Y |
| 6x-168 | Tamaizumi               | <i>T. aestivum</i> | Japan     | Y |
| 6x-169 | Kitanokaori             | <i>T. aestivum</i> | Japan     | N |
| 6x-170 | Minaminokaori           | <i>T. aestivum</i> | Japan     | Y |
| 6x-171 | Haruyokoi               | <i>T. aestivum</i> | Japan     | Y |
| 6x-172 | KS831957                | <i>T. aestivum</i> | USA       | N |
| 6x-173 | Hanamanten              | <i>T. aestivum</i> | Japan     | Y |
| 6x-175 | Kinuiroha               | <i>T. aestivum</i> | Japan     | Y |
| 6x-176 | U24                     | <i>T. aestivum</i> | China     | Y |
| 6x-177 | Seikai 165              | <i>T. aestivum</i> | Japan     | N |
| 6x-178 | Ayahikari               | <i>T. aestivum</i> | Japan     | Y |
| 6x-179 | Minaminokomugi          | <i>T. aestivum</i> | Japan     | Y |
| 6x-180 | Chogokuwase             | <i>T. aestivum</i> | Japan     | N |
| 6x-181 | Akimakigata-Abukumawase | <i>T. aestivum</i> | Japan     | Y |
| 6x-182 | Nishikazekomugi         | <i>T. aestivum</i> | Japan     | Y |
| 6x-183 | Chikugoizumi            | <i>T. aestivum</i> | Japan     | Y |
| 6x-184 | Iwainodaichi            | <i>T. aestivum</i> | Japan     | Y |
| 6x-185 | Shiroganekomugi         | <i>T. aestivum</i> | Japan     | Y |
| 6x-186 | Seikai 193              | <i>T. aestivum</i> | Japan     | Y |
| 6x-187 | Kitakamikomugi          | <i>T. aestivum</i> | Japan     | Y |
| 6x-188 | Nebarigoshi             | <i>T. aestivum</i> | Japan     | K |
| 6x-189 | Shunyou                 | <i>T. aestivum</i> | Japan     | N |
| 6x-190 | Fujimikomugi            | <i>T. aestivum</i> | Japan     | Y |
| 6x-191 | Gamenya                 | <i>T. aestivum</i> | Australia | Y |
| 6x-192 | Akadaruma               | <i>T. aestivum</i> | Japan     | Y |
| 6x-193 | Bobwhite                | <i>T. aestivum</i> | Mexico    | N |

<sup>1</sup> *GNI-A1* allele denotes variation at the 105th amino acid (N: asparagine, Y: tyrosine, or K: lysine). “-” indicates missing genotypes.

**Supplementary Table S2.** Members of the HRO bread wheat panel.

| Kitami no. | Line              | Species            | Country | <i>GNI-A1</i> allele <sup>1</sup> |
|------------|-------------------|--------------------|---------|-----------------------------------|
| -          | Haunsberg         | <i>T. aestivum</i> | Austria | N                                 |
| -          | Münstertaler      | <i>T. aestivum</i> | Austria | N                                 |
| -          | Niederndorferberg | <i>T. aestivum</i> | Austria | N                                 |
| -          | AC Readymade      | <i>T. aestivum</i> | Canada  | N                                 |
| -          | CDC Kestrel       | <i>T. aestivum</i> | Canada  | N                                 |
| -          | Norstar           | <i>T. aestivum</i> | Canada  | N                                 |
| -          | FHBRWBW Entry 28  | <i>T. aestivum</i> | CIMMYT  | N                                 |
| -          | Bussard           | <i>T. aestivum</i> | Germany | N                                 |
| -          | Flair             | <i>T. aestivum</i> | Germany | N                                 |
| -          | Pegassos          | <i>T. aestivum</i> | Germany | N                                 |
| -          | Trend-2740        | <i>T. aestivum</i> | Germany | N                                 |
| 04903      | Akasabi Shirazu1  | <i>T. aestivum</i> | Japan   | K                                 |
| 16985      | Hokushin          | <i>T. aestivum</i> | Japan   | K                                 |
| 05947      | Horosirikomugi    | <i>T. aestivum</i> | Japan   | N                                 |
| 25370      | Kitahonami        | <i>T. aestivum</i> | Japan   | Y                                 |
| 24141      | Kitamoe           | <i>T. aestivum</i> | Japan   | K                                 |
| 27268      | Kitasachiho       | <i>T. aestivum</i> | Japan   | K                                 |
| -          | OW104             | <i>T. aestivum</i> | Japan   | N                                 |
| 27814      | Takikeimugi2      | <i>T. aestivum</i> | Japan   | K                                 |

|       |               |                    |             |   |
|-------|---------------|--------------------|-------------|---|
| 27815 | Takikeimugi3  | <i>T. aestivum</i> | Japan       | K |
| 05946 | Takunekomugi  | <i>T. aestivum</i> | Japan       | K |
| 27269 | Tsurukichi    | <i>T. aestivum</i> | Japan       | N |
| -     | Yumechikara   | <i>T. aestivum</i> | Japan       | N |
| -     | Valujevskaja  | <i>T. aestivum</i> | Russia      | N |
| -     | Arina         | <i>T. aestivum</i> | Switzerland | N |
| -     | PI 173438     | <i>T. aestivum</i> | Turkey      | K |
| -     | ABBOT         | <i>T. aestivum</i> | UK          | N |
| -     | BEAVER        | <i>T. aestivum</i> | UK          | Y |
| -     | Blaze         | <i>T. aestivum</i> | UK          | N |
| -     | Charger       | <i>T. aestivum</i> | UK          | Y |
| -     | Civic         | <i>T. aestivum</i> | UK          | Y |
| -     | Consort       | <i>T. aestivum</i> | UK          | Y |
| -     | Haven         | <i>T. aestivum</i> | UK          | Y |
| -     | Hereward      | <i>T. aestivum</i> | UK          | N |
| -     | Rendezvous    | <i>T. aestivum</i> | UK          | N |
| -     | Rialto        | <i>T. aestivum</i> | UK          | N |
| -     | Sniper        | <i>T. aestivum</i> | UK          | Y |
| -     | Soldier       | <i>T. aestivum</i> | UK          | N |
| -     | Allegiance    | <i>T. aestivum</i> | USA         | N |
| -     | Betty         | <i>T. aestivum</i> | USA         | Y |
| -     | Brundage      | <i>T. aestivum</i> | USA         | N |
| -     | Chesapeake    | <i>T. aestivum</i> | USA         | N |
| -     | Co701610      | <i>T. aestivum</i> | USA         | N |
| -     | Coda          | <i>T. aestivum</i> | USA         | K |
| -     | Deloris       | <i>T. aestivum</i> | USA         | N |
| -     | Eltan         | <i>T. aestivum</i> | USA         | Y |
| -     | IDO361        | <i>T. aestivum</i> | USA         | N |
| -     | Iohardi       | <i>T. aestivum</i> | USA         | N |
| -     | Jagger        | <i>T. aestivum</i> | USA         | Y |
| -     | Karl92        | <i>T. aestivum</i> | USA         | N |
| -     | Madsen        | <i>T. aestivum</i> | USA         | N |
| -     | Palo Duro     | <i>T. aestivum</i> | USA         | Y |
| -     | Rely          | <i>T. aestivum</i> | USA         | K |
| -     | Satanta       | <i>T. aestivum</i> | USA         | K |
| -     | Stadler       | <i>T. aestivum</i> | USA         | N |
| -     | Stephens      | <i>T. aestivum</i> | USA         | N |
| -     | Turkey red II | <i>T. aestivum</i> | USA         | N |
| -     | Utah-100      | <i>T. aestivum</i> | USA         | N |
| -     | WA7811        | <i>T. aestivum</i> | USA         | N |
| -     | WA7813        | <i>T. aestivum</i> | USA         | Y |
| -     | WA7833        | <i>T. aestivum</i> | USA         | Y |
| -     | WA7834        | <i>T. aestivum</i> | USA         | K |
| -     | Weatherford   | <i>T. aestivum</i> | USA         | N |
| -     | Sava          | <i>T. aestivum</i> | Yugoslavia  | N |

<sup>1</sup> GNI-A1 allele denotes variation at the 105th amino acid (N: asparagine, Y: tyrosine, or K: lysine).
